# Supplementary material for: Association of inflammation/nutrition-based indicators with Parkinson’s disease and mortality
Source: PubMed Central journal article supplement (PMC11442420; doi:10.3389/fnut.2024.1439803), 2024-09-17
Supplement: Data_Sheet_1.pdf [file Data_Sheet_1.pdf]

## Online Supplementary Material

### Association of inflammation/nutrition-based indicators with Parkinson's disease and Mortality

**Figure S1.** Flowchart of the study

**Table S1.** Calculation methods of combination in each nutrition/inflammation-based indicator.

**Table S2.** Baseline characteristics of adult participants according to Parkinson's disease in NHANES 1999–2018.

**Table S3.** Logistic regression analysis of the relationship between inflammation and nutritional indicators and the prevalence of Parkinson's disease among adults in NHANES 1999–2018.

**Table S4.** COX regression analysis of the relationship between inflammation and nutritional indicators and all-cause mortality among adults in NHANES 1999–2018.

**Figure S2.** Kaplan-Meier survival curves for inflammation/nutrition-based indicator and mortality in adults.

**Figure S3.** Restricted cubic spline (RCS) analysis with multivariate-adjusted associations of inflammation/nutrition-based indicators with all-cause mortality among adults in NHANES 1999–2018.

**Figure S4.** Predictive value of time-dependent ROC assessment of inflammation and nutritional indicator for 3-, 5-, and 10-year all-cause mortality.

**Figure S5.** Kaplan-Meier survival curves for Parkinson's disease and mortality in adults.

## **Materials and methods: Other Covariates**

This section provides a comprehensive definition of potential confounding variables including family poverty income ratio (PIR,  $\leq 1.0$ , 1.1–3.0, or  $>3.0$ ), smoking status (never, former, or current smoker), drinking status (nondrinker, former drinker, or current drinker), physical activity (inactive, insufficiently active, or active), healthy eating index (HEI), and Charlson comorbidity index (CCI).

**Family poverty income ratio** Income was assessed using the poverty income ratio (PIR, the ratio of family income divided by a poverty threshold specific for family size using guidelines from the US Department of Health and Human Services) and categorized as  $\leq 1.0$ , 1.1–3.0 and  $>3.0$  [1].

**Smoking status** Never smokers were classified as those who reported smoking  $<100$  cigarettes during their lifetime. Those who smoked  $>100$  cigarettes in their lifetime were considered as current smokers, and those who smoked  $>100$  cigarettes and had quit smoking were considered as former smokers [2].

**Drinking status** Drinking status was classified as nondrinker, low-to-moderate drinker ( $<2$  drinks/day in men and  $<1$  drink/day in women), or heavy drinker ( $\geq 2$  drinks/day in men and  $\geq 1$  drinks/day in women) [2].

**Physical activity** Physical activity was categorized as inactive group (no leisure-time physical activity), insufficiently active group (leisure time moderate activity 1–5 times per week with MET ranging from 3 to 6 or leisure-time vigorous activity 1–3 times per week with MET  $>6$ ), or active group (those who had more leisure-time moderate-or-vigorous activity than above) [3].

**Healthy Eating Index** The Healthy Eating Index (HEI) is a measure calculated from 24-hour dietary recall data to assess diet quality based on the 2015–2020 Dietary Guidelines for Americans (DGA) [4]. It comprises 13 subgroups, with a total possible score of 100. Nine components evaluate adequacy (higher intakes contribute to a higher score) including total fruits, whole fruits, total vegetables, greens and beans, whole grains, dairy, total protein foods, seafood and plant proteins, and fatty acids. The remaining four components assess moderation (lower intakes yield a higher score), covering refined grains, sodium, added sugars, and saturated fats. The HEI offers a comprehensive

framework for understanding dietary patterns and their relationship to health outcomes, with scores reflecting adherence to key dietary recommendations.

**Charlson Comorbidity Index** The Charlson Comorbidity Index (CCI) is a method used to quantify an individual's overall health status by summing the scores assigned to various diseases [5]. It assumes respondents without reported diseases as healthy, assigning a zero value to unreported conditions. This scoring approach follows the methodology established by Zhao et al. in prior research [6], ensuring consistency in the assessment of comorbidities.

## References

1. **Services USDoHaH. Poverty Guidelines, Research, and Measurement**  
[<http://aspe.hhs.gov/POVERTY/index.shtml>.]
2. Qiu Z, Chen X, Geng T, Wan Z, Lu Q, Li L, Zhu K, Zhang X, Liu Y, Lin X *et al*: **Associations of Serum Carotenoids With Risk of Cardiovascular Mortality Among Individuals With Type 2 Diabetes: Results From NHANES**. *Diabetes Care* 2022, **45**(6):1453-1461.
3. Beddhu S, Baird BC, Zitterkoph J, Neilson J, Greene T: **Physical activity and mortality in chronic kidney disease (NHANES III)**. *Clin J Am Soc Nephrol* 2009, **4**(12):1901-1906.
4. Kirkpatrick SI, Reedy J, Krebs-Smith SM, Pannucci TE, Subar AF, Wilson MM, Lerman JL, Tooze JA: **Applications of the Healthy Eating Index for Surveillance, Epidemiology, and Intervention Research: Considerations and Caveats**. *J Acad Nutr Diet* 2018, **118**(9):1603-1621.
5. Kim CY, Sivasundaram L, LaBelle MW, Trivedi NN, Liu RW, Gillespie RJ: **Predicting adverse events, length of stay, and discharge disposition following shoulder arthroplasty: a comparison of the Elixhauser Comorbidity Measure and Charlson Comorbidity Index**. *J Shoulder Elbow Surg* 2018, **27**(10):1748-1755.
6. Zhao H, Pan Y, Wang C, Guo Y, Yao N, Wang H, Li B: **The Effects of Metal Exposures on Charlson Comorbidity Index Using Zero-Inflated Negative Binomial Regression Model: NHANES 2011-2016**. *Biol Trace Elem Res* 2021, **199**(6):2104-2111.

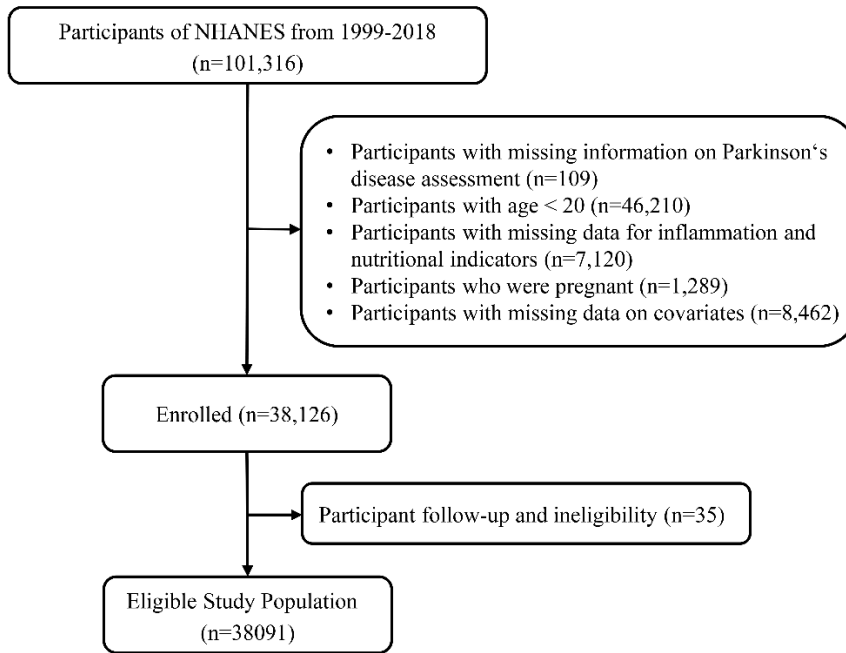

**Figure S1.** Flowchart of the study

**Table S1.** Calculation methods of combination in each nutrition/inflammation-based indicator.

| Indicators           | Definition or calculation formula                                                                            |                                              |           |                              |             |
|----------------------|--------------------------------------------------------------------------------------------------------------|----------------------------------------------|-----------|------------------------------|-------------|
| NAR                  | neutrophil count ( $\times 10^9$ )/ albumin (g/ L)                                                           |                                              |           |                              |             |
| PNI                  | albumin (g/L) + 5 $\times$ lymphocyte count ( $\times 10^9$ )                                                |                                              |           |                              |             |
| MAR                  | monocyte count ( $\times 10^9$ )/ albumin (g/ L)                                                             |                                              |           |                              |             |
| RAR                  | RDW (%)/ albumin (g/ L)                                                                                      |                                              |           |                              |             |
| HALP score           | [hemoglobin (g/L) $\times$ albumin (g/L) $\times$ lymphocytes ( $\times 10^9$ )]/platelets ( $\times 10^9$ ) |                                              |           |                              |             |
| ALI                  | BMI (kg/m <sup>2</sup> ) $\times$ albumin(g/dl)/NLR ( $\times 10^9$ )                                        |                                              |           |                              |             |
| GNRI                 | 1.489 $\times$ albumin (g/L) + (41.7 $\times$ current weight/ ideal body weight (IBW))                       |                                              |           |                              |             |
| CONUT score          | albumin score+ TLC score+ T-cho score                                                                        |                                              |           |                              |             |
| Serum albumin (g/dL) | albumin score                                                                                                | Total lymphocyte<br>(count/mm <sup>3</sup> ) | TLC score | Total cholesterol<br>(mg/dL) | T-cho score |
| 3.5-4.5              | 1                                                                                                            | $\geq 1600$                                  | 0         | $\geq 180$                   | 0           |
| 30-34.9              | 2                                                                                                            | 1200-1599                                    | 1         | 140-180                      | 1           |
| 25-29.9              | 4                                                                                                            | 800-1199                                     | 2         | 100-139                      | 2           |
| <25                  | 6                                                                                                            | 800                                          | 3         | 100                          | 3           |

If current weight is greater than IBW, current/IBW is regarded as 1. The IBW of men and women were calculated by the formula, height(cm)-100-[height (cm)-150/4] and height(cm)-100-[height (cm)-150/2.5], respectively.

**Table S2.** Baseline characteristics of adult participants according to Parkinson's disease in NHANES 1999–2018.

| Characteristics             | Total        | Parkinson's disease |             | <i>P</i> value |
|-----------------------------|--------------|---------------------|-------------|----------------|
|                             |              | No (n=37741)        | Yes (n=350) |                |
| Age, %                      |              |                     |             | <0.001         |
| 20-39 years                 | 12420(36.62) | 12383(36.82)        | 37(12.40)   |                |
| 40-59 years                 | 12519(38.43) | 12396(38.37)        | 123(46.39)  |                |
| ≥60 years                   | 13152(24.95) | 12962(24.81)        | 190(41.21)  |                |
| Sex, %                      |              |                     |             | 0.014          |
| Female                      | 18869(50.52) | 18693(50.46)        | 176(58.42)  |                |
| Male                        | 19222(49.48) | 19048(49.54)        | 174(41.58)  |                |
| Race/ethnicity, %           |              |                     |             | <0.001         |
| Non-Hispanic White          | 18033(71.13) | 17810(71.05)        | 223(81.09)  |                |
| Non-Hispanic Black          | 7505(9.93)   | 7455(9.95)          | 50(7.77)    |                |
| Other race                  | 12553(18.94) | 12476(19.00)        | 77(11.14)   |                |
| Marital status, %           |              |                     |             | 0.377          |
| Married/living with partner | 14974(35.56) | 14820(35.53)        | 154(38.69)  |                |
| Single/divorced/widowed     | 23117(64.44) | 22921(64.47)        | 196(61.31)  |                |
| Education level, %          |              |                     |             | 0.251          |
| Below high school           | 9572(15.84)  | 9464(15.81)         | 108(20.12)  |                |
| High school                 | 8911(24.18)  | 8840(24.18)         | 71(23.91)   |                |
| Above high school           | 19608(59.98) | 19437(60.02)        | 171(55.98)  |                |
| Family PIR, %               |              |                     |             | < 0.001        |
| ≤1.0                        | 7470(13.38)  | 7385(13.32)         | 85(20.56)   |                |
| 1.1–3.0                     | 16048(35.76) | 15884(35.71)        | 164(41.39)  |                |

|                                         |                       |                       |                       |        |
|-----------------------------------------|-----------------------|-----------------------|-----------------------|--------|
| >3.0                                    | 14573(50.86)          | 14472(50.97)          | 101(38.05)            |        |
| Smoking status, %                       |                       |                       |                       | 0.445  |
| Never smoker                            | 20236(53.26)          | 20071(53.28)          | 165(52.50)            |        |
| Former smoker                           | 9793(25.31)           | 9689(25.34)           | 104(23.01)            |        |
| Current smoker                          | 8043(21.40)           | 7962(21.38)           | 81(24.49)             |        |
| Drinking status, %                      |                       |                       |                       | 0.076  |
| Nondrinker                              | 8546(18.24)           | 8448(18.19)           | 98(24.45)             |        |
| Low-to-moderate drinker                 | 26263(71.68)          | 26031(71.71)          | 232(67.58)            |        |
| Heavy drinker                           | 3282(10.08)           | 3262(10.10)           | 20(7.97)              |        |
| Physical activity, %                    |                       |                       |                       | <0.001 |
| Inactive                                | 9934(20.99)           | 9795(20.88)           | 139(33.93)            |        |
| Insufficiently active                   | 14405(40.78)          | 14296(40.83)          | 109(34.41)            |        |
| Active                                  | 13752(38.23)          | 13650(38.29)          | 102(31.67)            |        |
| HEI-2015 score                          | 49.53(40.47,59.37)    | 49.53(40.48,59.38)    | 49.72(39.85,57.02)    | 0.435  |
| CCI                                     | 0.86(0.01)            | 0.85(0.01)            | 1.81(0.13)            | <0.001 |
| Inflammation and nutritional indicators |                       |                       |                       |        |
| Neutrophil, 10 <sup>3</sup> /μL         | 4.00(3.20,5.10)       | 4.00(3.20,5.10)       | 4.30(3.10,5.30)       | 0.154  |
| Lymphocyte, 10 <sup>3</sup> /μL         | 2.00(1.60,2.50)       | 2.00(1.60,2.50)       | 1.90(1.50,2.50)       | 0.044  |
| Monocyte, 10 <sup>3</sup> /μL           | 0.50(0.40,0.70)       | 0.50(0.40,0.70)       | 0.50(0.40,0.70)       | 0.761  |
| Hemoglobin, g/dL                        | 14.40(13.40,15.40)    | 14.40(13.40,15.40)    | 14.00(13.10,15.00)    | <0.001 |
| RDW, %                                  | 12.80(12.30,13.50)    | 12.80(12.30,13.50)    | 13.20(12.70,14.00)    | <0.001 |
| Serum albumin, g/L                      | 43.00(41.00,45.00)    | 43.00(41.00,45.00)    | 41.00(40.00,44.00)    | <0.001 |
| Total cholesterol, mg/dL                | 193.00(167.00,221.00) | 193.00(167.00,221.00) | 196.00(166.00,225.00) | 0.501  |
| Body mass index, kg/m <sup>2</sup>      | 27.71(24.10,32.22)    | 27.70(24.10,32.20)    | 29.20(24.40,33.89)    | 0.010  |
| Inflammation/nutrition-based indicators |                       |                       |                       |        |

|             |                       |                       |                       |        |
|-------------|-----------------------|-----------------------|-----------------------|--------|
| NAR         | 0.09(0.07,0.12)       | 0.09(0.07,0.12)       | 0.10(0.08,0.13)       | 0.016  |
| PNI         | 53.50(50.50,56.50)    | 53.50(50.50,56.50)    | 51.50(49.00,55.00)    | <0.001 |
| MAR         | 0.01(0.01,0.02)       | 0.01(0.01,0.02)       | 0.01(0.01,0.02)       | 0.358  |
| RAR         | 5.73(4.83,6.86)       | 5.73(4.83,6.86)       | 5.73(4.76,7.15)       | 0.819  |
| HALP score  | 0.30(0.28,0.32)       | 0.30(0.28,0.32)       | 0.32(0.30,0.34)       | <0.001 |
| ALI         | 50.57(39.00,65.49)    | 50.60(39.03,65.55)    | 47.20(34.45,60.97)    | 0.001  |
| GNRI        | 120.18(113.30,128.97) | 120.17(113.30,128.95) | 121.33(113.07,133.20) | 0.191  |
| CONUT score | 0.00(0.00,1.00)       | 0.00(0.00,1.00)       | 1.00(0.00,1.00)       | 0.247  |

Abbreviations: HEI-2015, Healthy Eating Index 2015; CCI, Charlson Comorbidity Index; RDW, red cell distribution width; NAR, neutrophil-albumin ratio; PNI, prognostic nutritional index; MAR, monocyte-albumin ratio; RAR, red cell distribution width-albumin ratio; HALP, hemoglobin, albumin, lymphocyte, and platelet; ALI, advanced lung cancer inflammation index; GNRI, geriatric nutrition risk index; CONUT, controlling nutritional status.

Normally distributed continuous variables are described as means  $\pm$  SEs, and continuous variables without a normal distribution are presented as medians [interquartile ranges]. Categorical variables are presented as numbers (percentages). N reflect the study sample while percentages reflect the survey-weighted data.



**Table S3.** Logistic regression analysis of the relationship between inflammation and nutritional indicators and the prevalence of Parkinson's disease among adults in NHANES 1999–2018.

|     | Crude              |                | Model 1            |                | Model 2            |                |
|-----|--------------------|----------------|--------------------|----------------|--------------------|----------------|
|     | OR (95% CI)        | <i>P</i> value | OR (95% CI)        | <i>P</i> value | OR (95% CI)        | <i>P</i> value |
| NEU | 1.293(0.989,1.692) | 0.061          | 1.304(0.991,1.715) | 0.058          | 1.109(0.826,1.487) | 0.489          |
| LYM | 0.779(0.587,1.034) | 0.083          | 0.910(0.690,1.200) | 0.502          | 0.829(0.618,1.112) | 0.209          |
| MON | 0.950(0.727,1.242) | 0.706          | 0.929(0.708,1.220) | 0.595          | 0.833(0.631,1.100) | 0.195          |
| Hb  | 0.643(0.475,0.871) | 0.005          | 0.705(0.487,1.022) | 0.065          | 0.709(0.492,1.021) | 0.064          |
| RDW | 2.261(1.609,3.179) | <0.001         | 1.983(1.397,2.816) | <0.001         | 1.686(1.171,2.427) | 0.005          |
| SAL | 0.565(0.403,0.794) | 0.001          | 0.704(0.496,0.999) | 0.050          | 0.797(0.562,1.129) | 0.200          |
| TC  | 1.094(0.830,1.441) | 0.523          | 0.884(0.664,1.177) | 0.397          | 0.971(0.733,1.287) | 0.837          |
| BMI | 1.344(1.015,1.779) | 0.039          | 1.244(0.941,1.645) | 0.124          | 1.098(0.838,1.437) | 0.495          |

Abbreviations: NEU, neutrophil; LYM, lymphocyte; MON, monocyte; Hb, hemoglobin; RDW, red cell distribution width; SAL, serum albumin; TC, total cholesterol; BMI, body mass index; Data are presented as OR (95% CI) unless indicated otherwise. Inflammation/nutrition-based indicators were classified into two groups based on the median, with participants below the median used as the reference in the regression model.

Model 1: Adjusted for age (20-39, 40-59, or  $\geq 60$  years), sex (male or female), and race/ethnicity (non-Hispanic White, non-Hispanic Black or other race); Model 2: Model 1 + marital status (married/living with partner, or single/divorced/widowed), education level (below high school, high school, or above high school), family PIR ( $\leq 1.0$ , 1.1–3.0, or  $> 3.0$ ), drinking status (nondrinker, former drinker, or current drinker), smoking status (never smoker, former smoker, or current smoker), physical activity (inactive, insufficiently active, or active), HEI (in quartiles), and CCI (continuous).

**Table S4.** COX regression analysis of the relationship between inflammation and nutritional indicators and all-cause mortality among adults in NHANES 1999–2018.

|     | Crude              |                | Model 1             |                | Model 2             |                |
|-----|--------------------|----------------|---------------------|----------------|---------------------|----------------|
|     | HR (95% CI)        | <i>P</i> value | HR (95% CI)         | <i>P</i> value | HR (95% CI)         | <i>P</i> value |
| NEU | 1.270(1.186,1.359) | <0.001         | 1.386(1.303, 1.476) | <0.001         | 1.137(1.064, 1.215) | <0.001         |
| LYM | 0.684(0.641,0.729) | <0.001         | 0.929(0.872, 0.990) | 0.024          | 0.827(0.778, 0.880) | <0.001         |
| MON | 1.591(1.473,1.719) | <0.001         | 1.415(1.315, 1.522) | <0.001         | 1.214(1.131, 1.304) | <0.001         |
| Hb  | 0.729(0.684,0.778) | <0.001         | 0.701(0.646, 0.760) | <0.001         | 0.692(0.638, 0.750) | <0.001         |
| RDW | 2.782(2.594,2.982) | <0.001         | 1.928(1.793, 2.072) | <0.001         | 1.650(1.534, 1.775) | <0.001         |
| SAL | 0.475(0.444,0.508) | <0.001         | 0.663(0.620, 0.708) | <0.001         | 0.713(0.666, 0.764) | <0.001         |
| TC  | 0.990(0.930,1.053) | 0.744          | 0.810(0.766, 0.858) | <0.001         | 0.874(0.824, 0.927) | <0.001         |
| BMI | 1.110(1.036,1.189) | 0.003          | 0.929(0.872, 0.991) | 0.024          | 0.849(0.798, 0.904) | <0.001         |

Abbreviations: NEU, neutrophil; LYM, lymphocyte; MON, monocyte; Hb, hemoglobin; RDW, red cell distribution width; SAL, serum albumin; TC, total cholesterol; BMI, body mass index; Data are presented as OR (95% CI) unless indicated otherwise. Inflammation/nutrition-based indicators were classified into two groups based on the median, with participants below the median used as the reference in the regression model.

Model 1: Adjusted for age (20-39, 40-59, or  $\geq 60$  years), sex (male or female), and race/ethnicity (non-Hispanic White, non-Hispanic Black or other race); Model 2: Model 1 + marital status (married/living with partner, or single/divorced/widowed), education level (below high school, high school, or above high school), family PIR ( $\leq 1.0$ , 1.1–3.0, or  $>3.0$ ), drinking status (nondrinker, former drinker, or current drinker), smoking status (never smoker, former smoker, or current smoker), physical activity (inactive, insufficiently active, or active), HEI (in quartiles), and CCI (continuous).

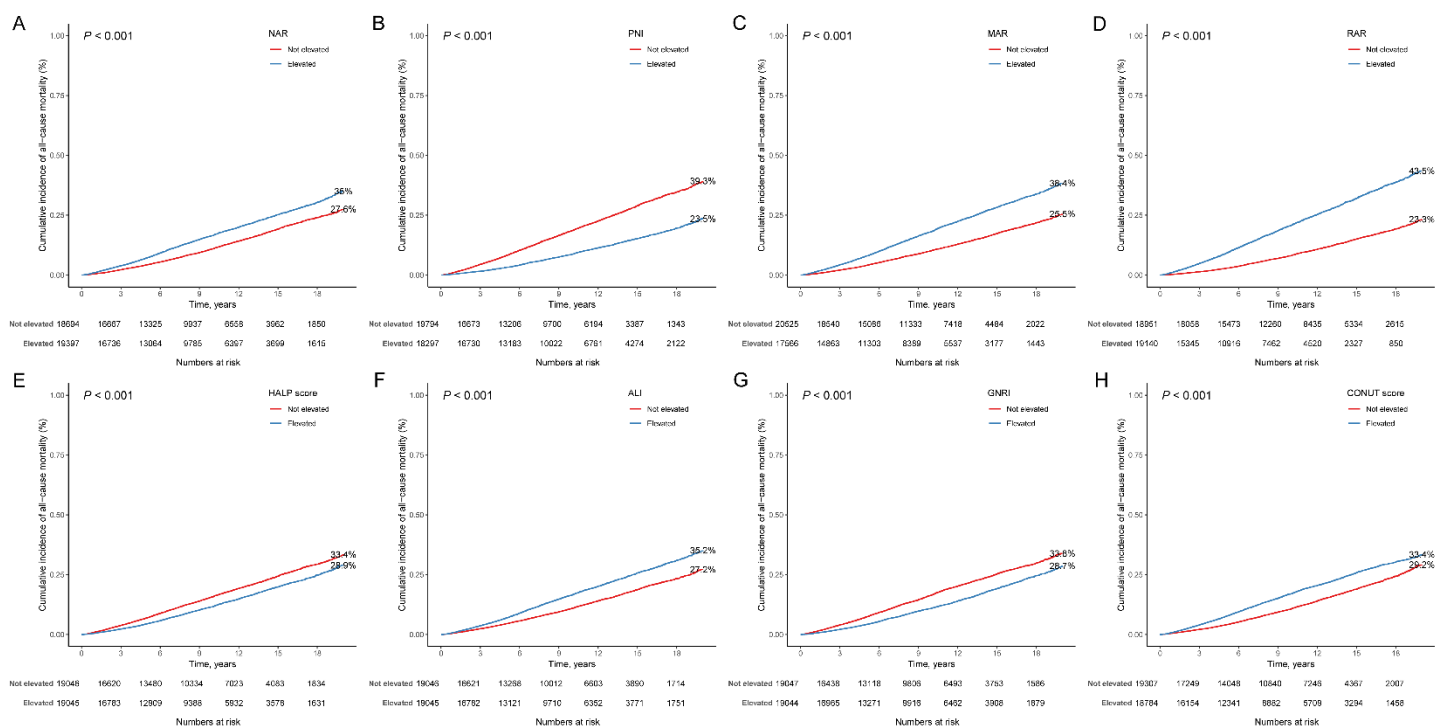

**Figure S2.** Kaplan-Meier survival curves for inflammation/nutrition-based indicators (A: NAR; B: PNI; C: MAR; D: RAR; E: HALP; F: ALI; G: GNRI; and H: CONUT) and mortality in adults. NAR, neutrophil-albumin ratio; PNI, prognostic nutritional index; MAR, monocyte-albumin ratio; RAR, red cell distribution width-albumin ratio; HALP, hemoglobin, albumin, lymphocyte, and platelet; ALI, advanced lung cancer inflammation index; GNRI, geriatric nutrition risk index; CONUT, controlling nutritional status.

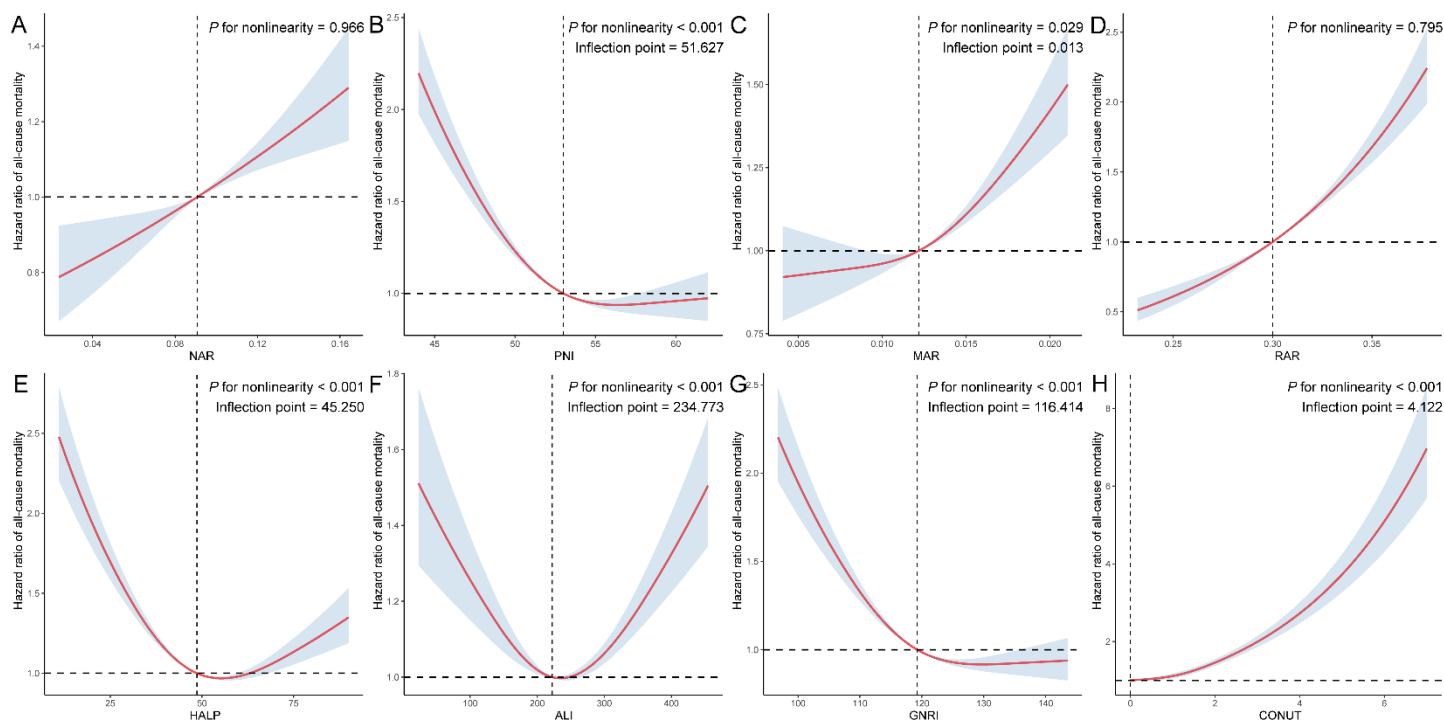

**Figure S3.** Restricted cubic spline (RCS) analysis with multivariate-adjusted associations of inflammation/nutrition-based indicators (A: NAR; B: PNI; C: MAR; D: RAR; E: HALP; F: ALI; G: GNRI; and H: CONUT) with all-cause mortality among adults in NHANES 1999–2018. Models are adjusted for age (20–39, 40–59, or  $\geq 60$  years), sex (male or female), race/ethnicity (non-Hispanic White, non-Hispanic Black or other race), marital status (married/living with partner, or single/divorced/widowed), education level (below high school, high school, or above high school), family PIR ( $\leq 1.0$ , 1.1–3.0, or  $> 3.0$ ), drinking status (nondrinker, former drinker, or current drinker), smoking status (never smoker, former smoker, or current smoker), physical activity (inactive, insufficiently active, or active), HEI (in quartiles), and CCI (continuous). NAR, neutrophil-albumin ratio; PNI, prognostic nutritional index; MAR, monocyte-albumin ratio; RAR, red cell distribution width-albumin ratio; HALP, hemoglobin, albumin, lymphocyte, and platelet; ALI, advanced lung cancer inflammation index; GNRI, geriatric nutrition risk index; CONUT, controlling nutritional status.

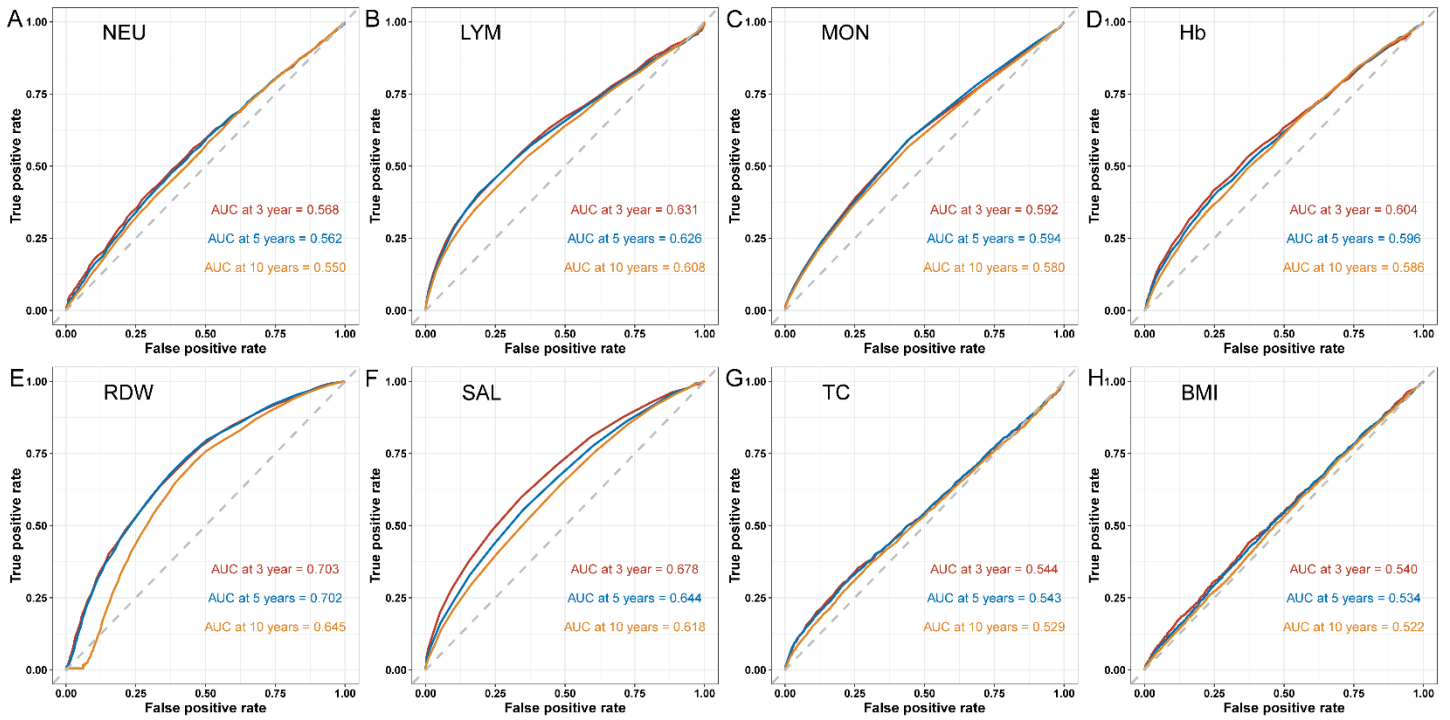

**Figure S4.** Predictive value of time-dependent ROC assessment of inflammation and nutritional indicators (A: NEU; B: LYM; C: MON; D: Hb; E: RDW; F: SAL; G: TC; and H: BMI) for 3-, 5-, and 10-year all-cause mortality. NEU, neutrophil; LYM, lymphocyte; MON, monocyte; Hb, hemoglobin; RDW, red cell distribution width; SAL, serum albumin; TC, total cholesterol; BMI, body mass index.

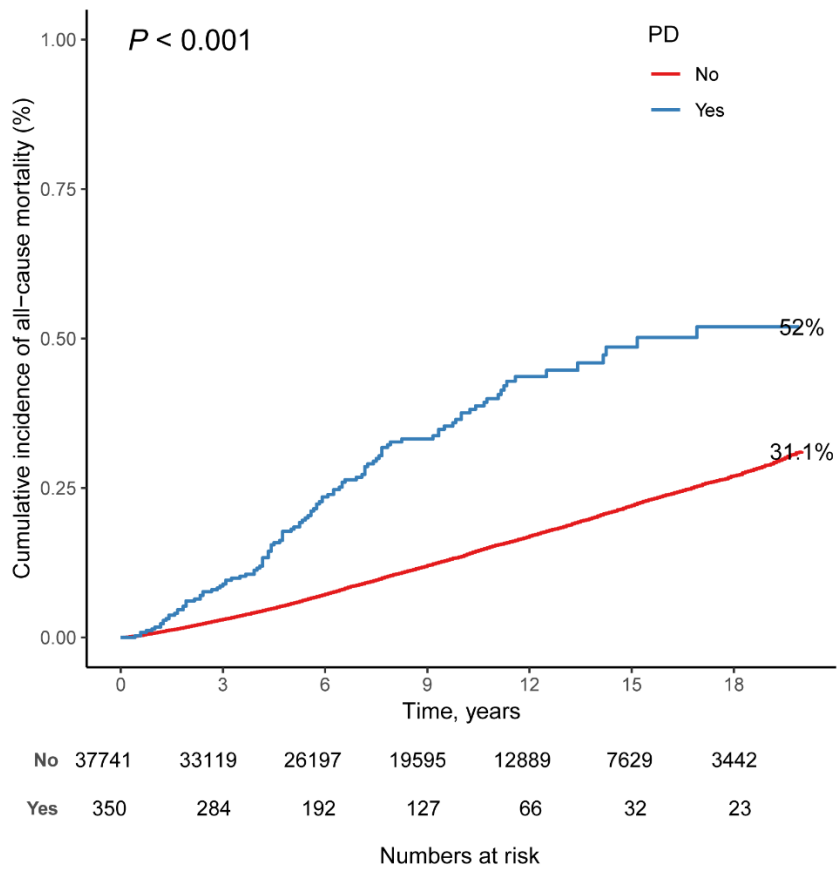

**Figure S5.** Kaplan-Meier survival curves for Parkinson's disease and mortality in adults.
